1 Article

# 2 **Cyano-assassins: Widespread cyanogenic** 3 **production from cyanobacteria**

4

5 **Manthos Panou and Spyros Gkelis \***

6 Department of Botany, School of Biology, Aristotle University of Thessaloniki, GR-541 24 Thessaloniki, Greece.

7 \* Correspondence: [sgkelis@bio.auth.gr](mailto:sgkelis@bio.auth.gr); Tel.: (+30-231-099-8083)

8 Received: date; Accepted: date; Published: date

9 **Abstract:** Cyanobacteria have been linked with hydrogen cyanide, based on their ability to  
10 catabolize it by the nitrogenase enzyme, as a part of nitrogen fixation. Nitrogenase can also use  
11 hydrogen cyanide instead of its normal substrate, dinitrogen and convert it to methane and  
12 ammonia. In this study, we tested whether cyanobacteria are able, not only to reduce, but also to  
13 produce HCN. The production of HCN was examined in 78 cyanobacteria strains from all five  
14 principal sections of cyanobacteria, both non-heterocytous and heterocytous, representing a variety  
15 of lifestyles and habitats. Twenty-eight (28) strains were found positive for HCN production, with  
16 universal representation amongst 22 cyanobacterial planktic and epilithic genera inhabiting  
17 freshwater, brackish, marine (including sponges), and terrestrial (including anchialine) habitats. The  
18 HCN production could be linked with nitrogen fixation, as all of HCN producing strains are  
19 considered capable of fixing nitrogen. Epilithic lifestyle, where cyanobacteria are more vulnerable to  
20 a number of grazers and accumulate more glycine, had the largest percentage (75%) of  
21 HCN-producing cyanobacteria compared to strains from aquatic ecosystems. Further, we  
22 demonstrate the isolation and characterisation of taxa like *Geitleria calcarea* and *Kovacikia*  
23 *musciola*, for which no strain existed and *Chlorogloea* sp. TAU-MAC 0618 which is, to the best of  
24 our knowledge, the first bacterium isolate from anchialine ecosystems. Our results highlight the  
25 complexity of cyanobacteria secondary metabolism, as well as the diversity of cyanobacteria in  
26 underexplored habitats, providing a missing study material for this type of environments.

27 **Keywords:** secondary metabolism; hydrogen cyanide; molecular phylogeny; epilithic lifestyle;  
28 defense mechanism; *Geitleria calcarea*.

29

---

## 30 **1. Introduction**

31 Cyanobacteria are ubiquitous photosynthetic prokaryotes, found literally in any illuminated  
32 environment and unexpectedly in some dark subsurface ones (Hubalek et al., 2016; Puente-Sánchez  
33 et al., 2018). This phylum predominated Earth, when the environment was still reductive ca. 1.3 billion  
34 years prior to the great oxidation event (Gumsley et al., 2017). Cyanobacteria often produce  
35 secondary metabolites, in response to biotic or abiotic stress in the surrounding environment,  
36 providing protection and aiding in survival over other species (Gupta et al., 2013; Singh et al., 2016).

37 Cyanobacteria are considered to be the ancestors of chloroplasts genome (Allen, 2015). For  
38 example, plants have probably obtained gene copies implicated in a variety of biosynthetic pathways  
39 through early horizontal gene transfer from proteobacteria and cyanobacteria (Timmis et al., 2004). A  
40 number of secondary metabolites (e.g. many terpenoids, quinolizidine alkaloids, piperidine alkaloid  
41 coniine) are produced completely or partly in chloroplasts and/or mitochondria (Wink, 2003, 2008).  
42 Moreover, there is an indication that many enzymes and pathways are common in plant and  
43 cyanobacteria secondary metabolite production (Chen et al., 2016; Nielsen et al., 2016).

44 The term “cyanide” is used loosely and refers to both the cyanide anion (CN<sup>-</sup>) and undissociated  
45 hydrogen cyanide (HCN) (Knowles and Bunch, 1986). Cyanides are present in various environmental  
46 elements such as water, soil, food and biological materials like blood urine and saliva at the levels of  
47 micrograms per litre to milligrams per litre (Dzombak et al., 2006; Barceloux, 2009). Considering the  
48 presence of cyanide in various parts of the inanimate environment and biota as well as their toxicity,  
49 there is no doubt on increasing demand for information on their prevalence in the elements of the

50 environment (Dzombak et al., 2006). This compound has been found in some foods and seeds in the  
51 amounts above the limit recommended by WHO and FAO (Gernah et al., 2011). The pKa of cyanide  
52 is 9.3; it is therefore present largely as HCN at neutral pH values (Eisler and Wiemeyer, 2004). HCN is  
53 volatile (boiling point 26°C) and is less dense than air. Hence, cyanide formed by microbial cultures  
54 will be rapidly lost to the environment. Cyanide is largely toxic for aerobic cell metabolism as it binds to  
55 the mitochondrial cytochrome oxidase a3 enzyme; binding of cyanide to the ferric ion of the  
56 cytochrome oxidase a3 inhibits the terminal enzyme in the respiratory chain and halts the electron  
57 transport and oxidative phosphorylation, which subsequently leads to intracellular hypoxia (Hall,  
58 2007).

59 Despite its toxicity, cyanide is a natural compound synthesized by a variety of organisms,  
60 including bacteria, fungi, plants, and animals, in which cyanogenesis may serve as defensive or  
61 offensive mechanism (Luque-Almagro et al., 2016). The HCN synthase required for bacterial  
62 cyanogenesis is expressed during transition from exponential to stationary phase of growth under  
63 oxygen limitation in response to the FNR-like anaerobic regulator ANR (Luque-Almagro et al., 2016).  
64 On the other hand, many microorganisms have evolved enzymatic pathways for cyanide degradation,  
65 transformation, or tolerance, and many of them are even able to use cyanide as a nitrogen source for  
66 growth (Luque-Almagro et al., 2016; Kumar et al., 2017; Park et al., 2017).

67 To date the green alga *Chlorella vulgaris* and the cyanobacteria *Anacystis nidulans*  
68 (= *Asterocapsa nidulans*), *Plectonema borganum*, and *Nostoc muscorum*, are the only photosynthetic  
69 micro-organisms known to be cyanogenic (Pistorius et al., 1979; Vennesland, 1981). However, it is  
70 likely, given the nature of the cyanogenic pathways involved, that many more of these  
71 micro-organisms to be cyanide producers. Photosynthetic micro-organisms synthesize cyanide from  
72 a wide range of metabolites by at least two distinct systems (Vennesland et al., 1982) (i) the amino  
73 acid oxidase-peroxidase system and (ii) the glyoxylic oxime system.

74 Diazotrophic cyanobacteria have been linked with hydrogen cyanide, based on their ability to  
75 catabolize it by nitrogenase, an enzyme normally responsible for the reduction of N<sub>2</sub>. Nitrogenase can  
76 also use hydrogen cyanide instead of its normal substrate, dinitrogen and convert it to methane and  
77 ammonia (Gantzer and Maier, 1990). The N<sub>2</sub>-fixing cyanobacterium, *Anabaena* is able to biodegrade  
78 cyanides and produce CH<sub>4</sub> in batch reactors. Gantzer and Maier (Gantzer and Maier, 1990) showed  
79 that *Anabaena* reduced cyanides by nitrogenase to CH<sub>4</sub> and NH<sub>3</sub>. The rate for CH<sub>4</sub> production was  
80 ten times faster than expected based on literature. However, in these cases, the assumption was  
81 made based on induced HCN in batch reactor.

82 In this study, we tested whether cyanobacteria are able, not only to reduce, but also to produce  
83 HCN, broadening our knowledge on the biosynthesis of this unique molecule. We examined HCN  
84 production in representative genera from all five of the principal sections of cyanobacteria, in both  
85 non-heterocytous and heterocytous species, representing a variety of lifestyles and habitats. We also  
86 correlate the production of HCN with epilithic lifestyle as the main hypothesis for the HCN production  
87 from cyanobacteria.

## 88 **2. Materials and Methods**

### 89 *2.1 Cyanobacterial Strains*

90 Seventy-eight (78) strains of cyanobacteria, representing five cyanobacteria orders, with  
91 different morphological features and a wide variety of habitats and lifestyles, were used in this study  
92 (Table S1). Twenty-nine strains were isolated from different freshwaters of Greece (Gkelis et al.,  
93 2019), nine of them were isolated from sponges (Konstantinou et al., 2018), whereas the rest 40  
94 strains were isolated in this study from various environments (terrestrial caves, coastal areas, thermal  
95 springs, brackish and freshwater systems) across Europe, between 2013 and 2018. Strains were  
96 isolated on solid growth media using classical microbiological techniques (see (Gkelis et al., 2005,  
97 2015)), purified by successive transfers and using antibiotics (such as cycloheximide and ampicillin)  
98 as described in Rippka (Rippka, 1988); all strains were derived from a single colony or trichome. The  
99 cultures were grown as batch clonal unialgal cultures in BG11, with or without (for the nitrogen-fixing  
100 strains) nitrogen, and MN medium (Rippka, 1988). All strains are deposited in the Thessaloniki  
101 Aristotle University Microalgae and Cyanobacteria (TAU-MAC) culture collection (Gkelis and Panou,

102 2016) and maintained at  $20 \pm 1^\circ\text{C}$  or  $25 \pm 1^\circ\text{C}$  (for strains of the genera *Desertifilum* and *Calothrix*) with  
103 a light intensity of  $25 \mu\text{mol m}^{-2}\text{s}^{-1}$  and with a light/dark cycle of 12:12h.

104

## 105 2.2 Cyanogenesis analysis

106 In order to assess the ability to produce HCN and estimate the relative frequency of cyanogenesis  
107 (proportion of cyanogenic versus acyanogenic cyanobacteria strains), we screened each strain for the  
108 presence of HCN using the Feigl-Anger assay, which determines the presence or absence of HCN in a  
109 sample using a colour change reaction (Gleadow and Møller, 2014). In this assay, the dried paper turns  
110 blue following oxidation of the tetra base when it is exposed to the HCN gas that is produced. For the  
111 extraction of HCN, we modified the original protocol (Thompson et al., 2016), implemented in plants and  
112 includes freeze-thaw, as freeze-thaw is not an efficient method for cell lysis in cyanobacteria (Kim et al.,  
113 2009). Cyanobacteria cells were harvested at the exponential growth phase (between 30-45 days of  
114 growth) by centrifugation of 1.5 mL culture material. The supernatant was removed and the pellet was  
115 dissolved in 0.8 mL of Lysis Buffer (2% w/v Cetyl trimethylammonium bromide, 100 mM Tris-HCl, 1.4 M  
116 NaCl, 1% w/v Polyvinylpyrrolidone, 20 mM,  $\text{Na}_2\text{EDTA}$  0.2% w/v LiCl, pH 8). The same procedure was  
117 repeated with the addition of  $\text{dH}_2\text{O}$  instead of Lysis Buffer. A 96-well plate was filled with 80  $\mu\text{L}$  of  
118 cyanobacteria isolates extract to each well. We secured Feigl-Anger test paper over the plates,  
119 incubated the plates for 1.5 h at  $37^\circ\text{C}$ , and then scored each well for cyanide, which is indicated by a  
120 blue colour (Figure S1). A permanent record of the detection paper was made by scanning the paper  
121 immediately after exposure because the blue color fades with time. As positive control, 4  $\text{cm}^2$  of leaf  
122 tissue of a cyanogenic individual of the plant *Trifolium repens* (Deligiannis et al., 2018) was used.

## 123 2.3 Nitrogen fixation capability

124 Cyanobacteria strains were also evaluated for the ability to perform nitrogen fixation by PCR  
125 targeting one gene fragment (*nifH*) of the nitrogenase gene cluster (Table S2). The reactions were  
126 performed according to Panou et al. (Panou et al., 2018). Thermal cycling was carried out using an  
127 Eppendorf MasterCycler Pro (Eppendorf). PCR products were separated by 1.5% (w/v) agarose gel  
128 in 1X TAE buffer. The gels were stained with Midori Green Advanced (NIPPON Genetics Europe  
129 GmbH) and photographed under UV transillumination.

## 130 2.4 Polyphasic taxonomy

131 The cyanobacteria isolates, which were positive for the production of HCN, were characterised  
132 based on their morphology and their phylogeny as described in Gkelis et al. (Gkelis et al., 2019).  
133 Briefly, strains were identified based on their morphology using the taxonomy books by Komárek and  
134 Anagnostidis (Anagnostidis and Komarek, 1988; Komarek and Anagnostidis, 1989; Komárek and  
135 Anagnostidis, 2008) and Komárek (Komárek, 2013). The phycocyanin operon and the internal  
136 genetic spacer (*cpcBA*-IGS), 16S rRNA gene, and the 16S-23S rRNA internal transcribed spacer  
137 (ITS) were used to assess the molecular phylogeny of the strains. PCR was carried out on using the  
138 primer pairs shown in Table S2 and PCR conditions described in detail in Gkelis et al. (Gkelis et al.,  
139 2019). Sequence data were obtained by capillary electrophoresis (GENEWIZ, Takeley, UK). The  
140 obtained nucleotide sequences were edited with Unipro UGENE 1.29.0 (Okonechnikov et al., 2012).  
141 Nucleotide sequences were deposited in GenBank database of the National Center for Biotechnology  
142 Information (NCBI) (Table S3). Sequences were blasted and the closest relative(s) for each  
143 sequence were included in the phylogenetic trees. For the phylogenetic analyses, we selected  
144 sequences (>1200 and >600 bp, for 16S-23S rRNA and *cpcBA*-IGS, respectively) in order to examine  
145 phylogenetic position of our strains. The phylogenetic analyses were conducted with Mega (V7.0)  
146 software (Kumar et al., 2016). Multiple sequence alignments were conducted using the CLUSTALW  
147 software. All missing data and gaps were excluded from the analysis by choosing the complete  
148 deletion option. A consensus phylogenetic tree were constructed using maximum likelihood (ML).  
149 The best fitting evolutionary models for the ML analyses were the Tamura 3-parameter + G model for  
150 all the targets analysed. Bootstrap replicates ( $n=1,000$ ) were performed. Phylogeny was also inferred  
151 with Bayesian Inference (BI) phylogenetic approach with MrBayes (V3.2.6) software (Ronquist et al.,  
152 2012). The general time-reversible (GTR) with gamma distribution of rates and a proportion of

153 invariable sites evolutionary model was selected by applying PAUP\* (V5.0) (Swofford, 2002).  
 154 Bayesian analysis consisted of two independent Markov Chain Monte Carlo runs, performed by four  
 155 differentially heated chains of  $10 \times 10^6$  generations and trees were sampled from the chain every  
 156 1000 generations. All phylogenetic trees were visualized via the FigTree (V1.4.3) software  
 157 (Rambaut).

### 158 3. Results

#### 159 3.1 HCN Production

160 Twenty-eight (28) cyanobacteria strains (Table 1) were found positive for HCN production  
 161 (Figure S1). Cyanobacteria strains, with different lifestyles, were found capable of producing HCN  
 162 (Figure 1). Strains, isolated from mats in rocks, were found to be positive in HCN production with a  
 163 relative frequency of 75 %. Three strains (50 % percentage) from brackish environments were found  
 164 positive for the production of HCN, whilst cyanide was found to be present also in sponge-associated  
 165 cyanobacteria, even though in low percentage (only 22% of the sponge symbiotic cyanobacteria  
 166 tested). The habitat, with the lowest number of HCN-producing isolates, was freshwater ecosystems  
 167 (Table 1, Figure 1), where only the 13 % of freshwater cyanobacteria were positive for HCN  
 168 production.

169 **Table 1.** Cyanobacteria strains of TAU-MAC collection positive for HCN production, their origin,  
 170 habitat, and lifestyle. Table S3 contains the complete list of strains tested for HCN production.

| Strain                                        | Lifestyle (Habitat)             | Origin                       | Reference                         |
|-----------------------------------------------|---------------------------------|------------------------------|-----------------------------------|
| <i>Aliinostoc</i> sp. TAU-MAC 3117            | Planktic (Brackish)             | Lake Pikrolimni, Greece      | This study                        |
| <i>Calothrix thermalis</i> TAU-MAC 1117       | Epilithic (Thermal Spring)      | Mývatn, Iceland              | This study                        |
| <i>Chlorogloeopsis fritschii</i> TAU-MAC 0599 | Planktic (Freshwater)           | Lake Mikri Prespa, Greece    | (Gkelis et al., 2019)             |
| <i>Chlorogloea</i> sp. TAU-MAC 0618           | Epilithic (Anchialine Cave)     | Túnel de la Atlántida, Spain | This study                        |
| <i>Cyanobacterium stanieri</i> TAU-MAC 3217   | Planktic (Brackish)             | Kalochori lagoon, Greece     | This study                        |
| <i>Desertifilum tharense</i> TAU-MAC 1517     | Epilithic (Thermal Spring)      | Mývatn, Iceland              | This study                        |
| <i>Geitleria calcarea</i> TAU-MAC 0118        | Epilithic (Terrestrial Cave)    | Anthropograva, Greece        | This study                        |
| <i>Gloeotrichia echinulata</i> TAU-MAC 3718   | Planktic (Freshwater)           | Lake Peipsi, Estonia         | This study                        |
| <i>Jaaginema</i> sp. TAU-MAC 0110             | Planktic (Freshwater)           | Lake Volvi, Greece           | (Gkelis et al., 2019)             |
| <i>Komarekiella</i> sp. TAU-MAC 0117          | Epilithic (Terrestrial Cave)    | Agio Galas, Greece           | This study                        |
| <i>Komarekiella</i> sp. TAU-MAC 0217          | Epilithic (Terrestrial Cave)    | Agio Galas, Greece           | This study                        |
| <i>Kovacicikia muscicola</i> TAU-MAC 0518     | Epilithic (Terrestrial Cave)    | Perama, Greece               | This study                        |
| <i>Leptothoe spongobia</i> TAU-MAC 1115       | Sponge-associated               | Kassandra, Greece            | (Konstantinou et al., 2018, 2019) |
| <i>Myxosarcina</i> sp. TAU-MAC 3418           | Epilithic (Marine Coastal Rock) | Afytos, Greece               | This study                        |
| <i>Nodularia harveyana</i> TAU-MAC 0817       | Planktic (Brackish)             | Lake Prikrolimni, Greece     | This study                        |
| <i>Nodularia spumigena</i> TAU-MAC 3417       | Planktic (Brackish)             | Kalochori lagoon, Greece     | This study                        |
| <i>Nostoc muscorum</i> TAU-MAC 1518           | Epilithic (Terrestrial Cave)    | Perama, Greece               | This study                        |
| <i>Oculatella</i> sp. TAU-MAC 3318            | Epilithic (Terrestrial Cave)    | Perama, Greece               | This study                        |
| <i>Phormidium</i> sp. TAU-MAC 0417            | Epilithic (Terrestrial)         | Olympon, Greece              | This study                        |

|                                                        |                                |                    |                             |
|--------------------------------------------------------|--------------------------------|--------------------|-----------------------------|
| <i>Radiocystis</i> sp. TAU-MAC 1214                    | Cave)<br>Planktic (Freshwater) | Lake Karla, Greece | This study                  |
| <i>Scytonema hyalinum</i> TAU-MAC 2618                 | Epilithic (Terrestrial Cave)   | Grava, Greece      | This study                  |
| <i>Sphaerospermopsis aphanizomenoides</i> TAU-MAC 1314 | Planktic (Freshwater)          | Lake Karla, Greece | This study                  |
| <i>Synechococcus</i> sp. TAU-MAC 0815                  | Sponge-associated              | Kassandra, Greece  | (Konstantinou et al., 2018) |
| <i>Tolypothrix</i> sp. TAU-MAC 2518                    | Epilithic (Terrestrial Cave)   | Grava Cave, Greece | This study                  |

171

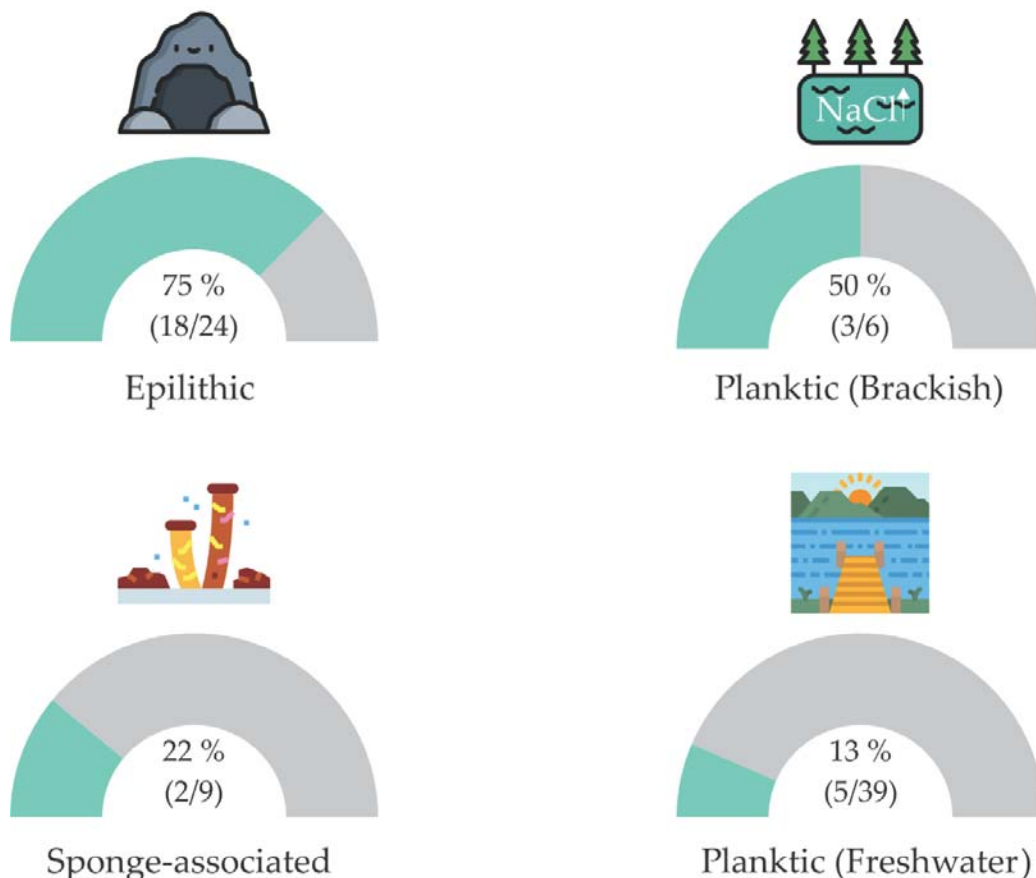

172

173

174

**Figure 1.** Cyanogenic relative frequency of cyanobacteria strains amongst different lifestyles presented with Gauge charts.

175

### 3.2 Polyphasic Taxonomy

176

177

178

179

180

181

182

According to the combined morphology (Figure 2) and the phylogeny based on 16S-23S ribosomal RNA (rRNA) and *cpcBA*-internal genetic spacer (IGS) regions (Figure 3), the strains, isolated in this study, positive for HCN production were classified into 18 genera and 20 taxa belonging to Chroococcales, Synechococcales, Oscillatoriales, Nostocales, and Pleurocapsales. Nine strains were identified to the genus level (*Alliinostoc*, *Chloroglea*, *Oculatella*, *Komarekiella*, *Myxosarcina*, *Phormidium*, *Radiocystis*, and *Tolypothrix*), whereas the rest were identified up to the species level.

183

184

185

186

187

Strains isolated from terrestrial caves formed clades with no more than two sequences, due to limited available sequences for cyanobacteria derived from these type of environments (Figure 3). Specifically, *Geitleria calcarea* TAU-MAC 0118 clustered with two uncultured *Geitleria* sp. sequences, whilst *Alliinostoc* sp. TAU-MAC 3117 was placed separately, outside two uncultured *Alliinostoc* sp. sequences. *Komarekiella* strains, isolated from a show cave in Chios Island in NE



188 Aegean Sea, clustered together, separately of two *Komarekiella atlantica* strains, isolated from a  
189 tropical rainforest in Hawaii.

### 190 3.3 *NifH* Amplification

191 The *nifH* gene fragment was amplified (Figure S2) in 53 of the total 78 (67 %) cyanobacteria  
192 strains tested for HCN production (Figure S2). The *nifH* was present in all HCN-producing  
193 cyanobacteria strains, as well as in 25 more strains. All strains, classified to Nostocales order, carried  
194 the *nifH* gene fragment, whilst *nifH* was also amplified in non-heterocytous genera.

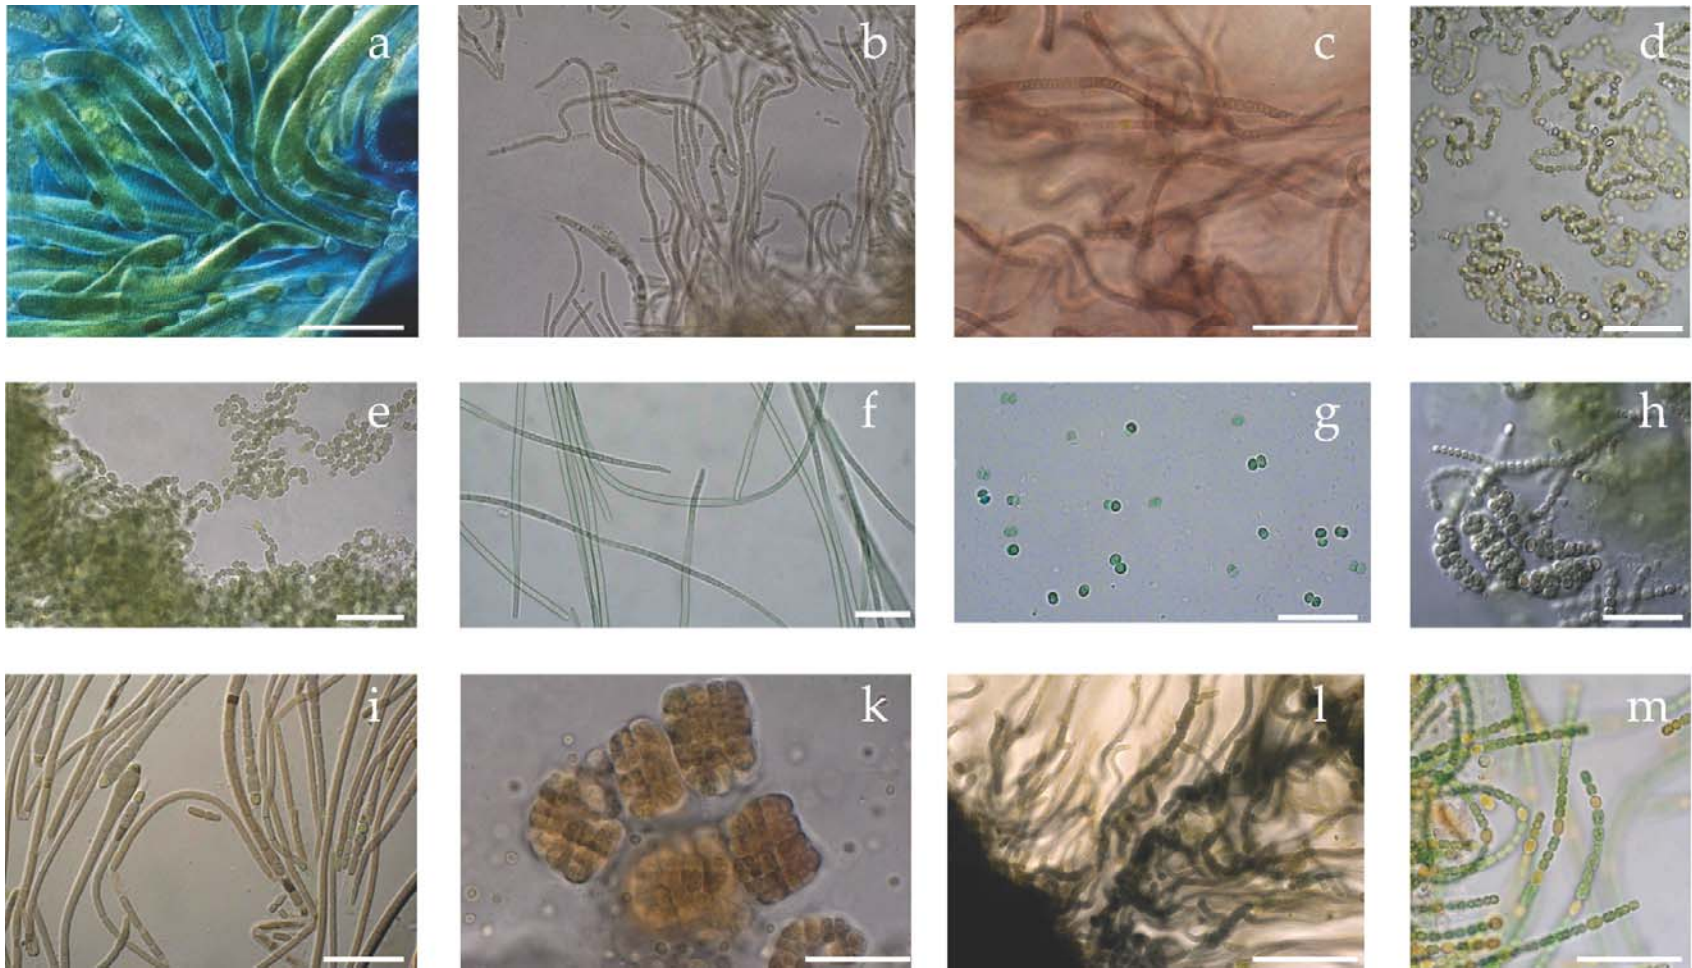

**Figure 2.** Microphotographs of strains, isolated in this study, representing 12 genera of cyanobacteria strains capable of producing HCN. (a) *Gloeotrichia echinulata* TAU-MAC 3718; (b) *Kovacikia muscicola* TAU-MAC 0518; (c) *Oculatella* sp. TAU-MAC 3318; (d) *Aliinostoc* sp. TAU-MAC 3117; (e) *Nostoc muscorum* TAU-MAC 1518; (f)

195  
196  
197  
198

199  
200

*Desertifilum tharense* TAU-MAC 1517; (g) *Radiocystis* sp. TAU-MAC 1214; (h) *Komarekiella* sp. TAU-MAC 0117; (i) *Calothrix thermalis* TAU-MAC 1117; (k) *Myxosarcina* sp. TAU-MAC 3418; (l) *Geitleria calcarea* TAU-MAC 0118; (m) *Nodularia harveyana* TAU-MAC 0817. Scale bar = 10  $\mu$ m.



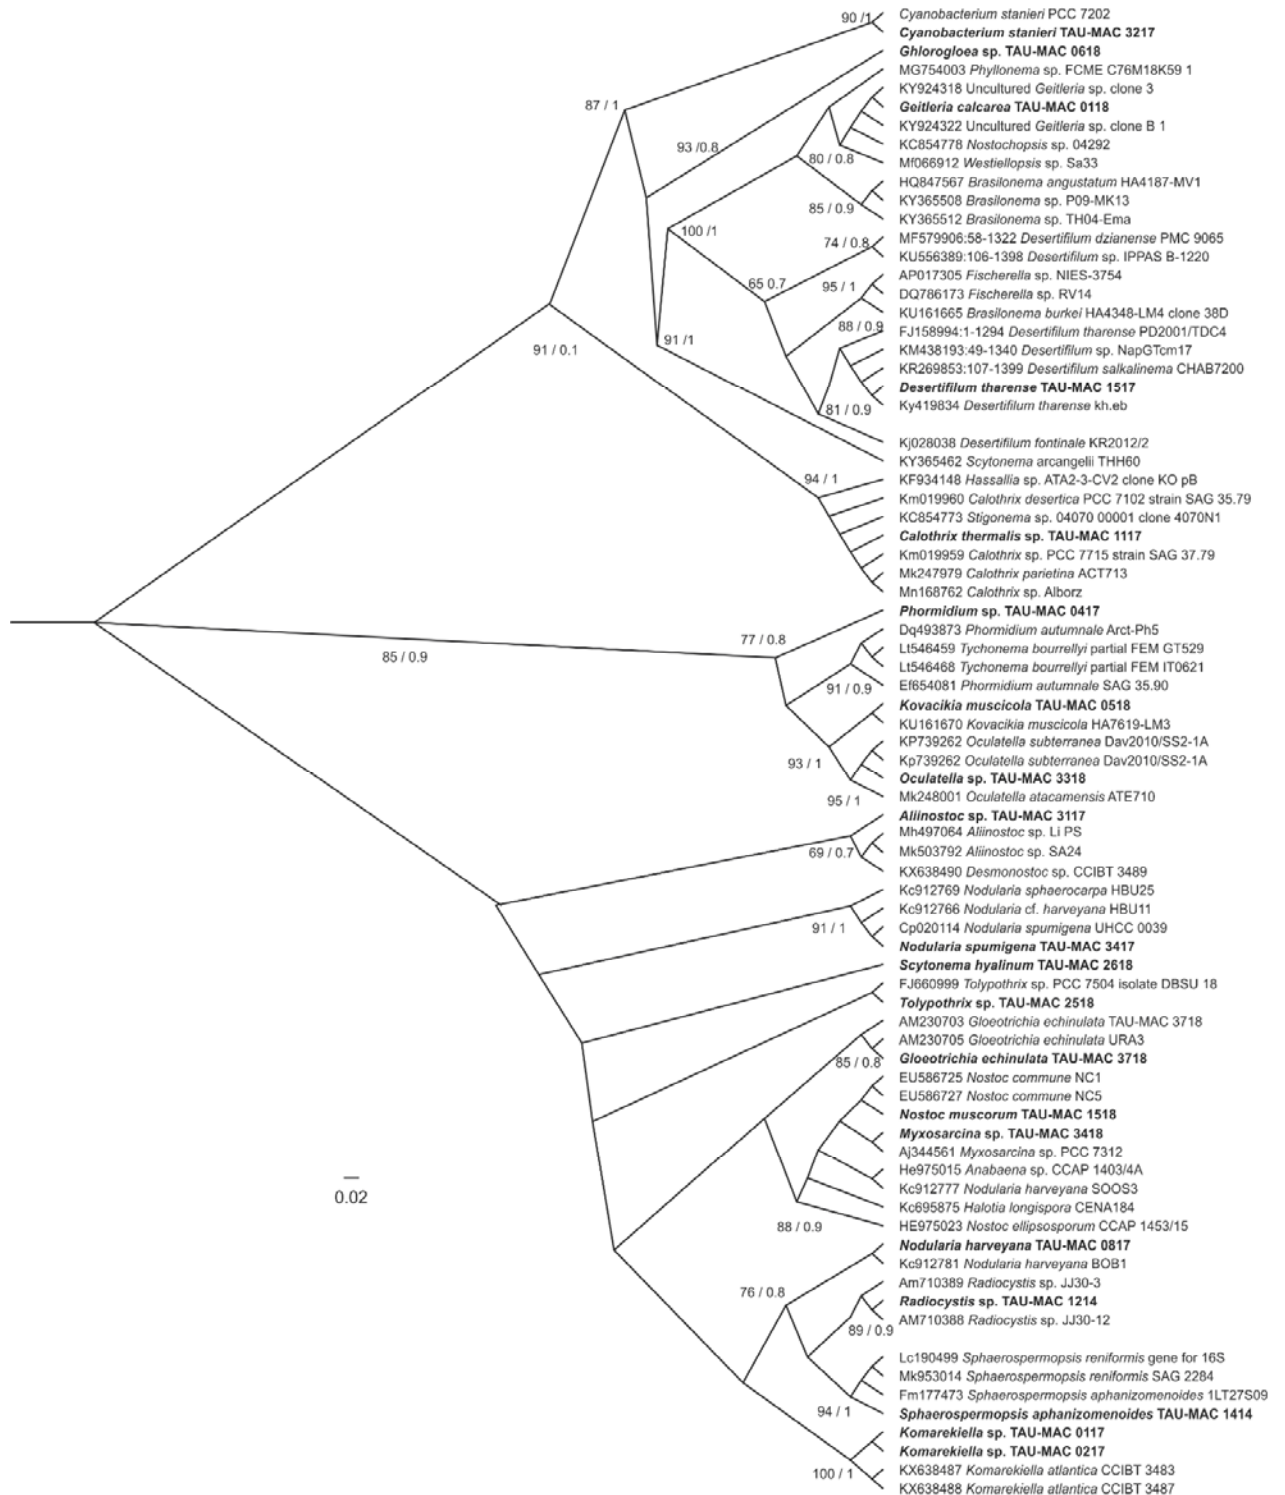

201

202 **Figure 3.** Phylogenetic tree based on 16S-23S rRNA and cpcBA-IGS sequences of HCN-producing  
 203 cyanobacteria strains, isolated and described in this study. The phylogenetic tree was reconstructed using the  
 204 Maximum-Likelihood (ML) and the Bayesian Inference (BI) analyses. ML topology is demonstrated. Numbers  
 205 above branches indicate the bootstrap value (as percentages of 1,000 replications) for ML method and the  
 206 posterior probabilities for BI method, respectively. Strains of the present study are indicated in bold. Bar  
 207 represents 0.020 nucleotide substitutions per site.

## 208 4. Discussion

### 209 4.1 Cyanogenic Cyanobacteria

210 In this study we demonstrate the production of cyanide from 28 cyanobacterial strains classified  
211 to 22 planktic and epilithic genera inhabiting freshwater, brackish, marine, terrestrial, and  
212 sponge-associated habitats. HCN production is stimulated mainly from histidine (Pistorius and Voss,  
213 1977) and other aromatic amino acids is a general reaction catalysed by D-amino acid and L-amino  
214 acid oxidoreductases. The stoichiometry of this process was investigated by Gewitz et al. (Gewitz et  
215 al., 1980) using snake venom L-amino acid oxidase and horseradish. Under optimal conditions, this  
216 system converted 72% of the added histidine into cyanide. Other products of the reaction were  
217 imidazole- Caldehyde, imidazole4carboxylic acid, CO, ammonia, water and imidazole acetic acid.  
218 The amount of CO, produced equalled the quantity of histidine oxidized and the sum of the ammonia  
219 plus cyanide formed. The cyanide production pathway is conserved in different type of organisms and  
220 it mainly contains an L-amino acid and its oxidase (Knowles and Bunch, 1986).

221 The production of cyanide by algae was first demonstrated by Gewitz et al. (Gewitz et al., 1976b)  
222 in 1976 in the green-alga *Chlorella vulgaris*. They showed that HCN is formed in small amounts when  
223 extracts were illuminated in the presence of O<sub>2</sub> and supplemented with Mn<sup>2+</sup> ions and peroxidase. In  
224 their study, a large number of amino acids were tested as possible precursors of HCN and D-Histidine  
225 was found to be the best promotor of cyanogenesis. Other aromatic amino acids could also promote  
226 cyanide formation (Gewitz et al., 1976a). These experiments also showed, that even though extracts  
227 of *Chlorella vulgaris* released HCN from amygdalin, a plant cyanogen, the HCN produced under  
228 oxidative conditions was not formed in this way (Gewitz et al., 1976b). Interestingly, the New Zealand  
229 spinach plant has a similar system for producing HCN (Gewitz et al., 1976a), as well as it was able to  
230 form cyanogenic glucosides in the grana. Further studies revealed details of the mechanism, used by  
231 the extracts of *Chlorella vulgaris* to convert histidine to HCN. Pistorius et al. (Pistorius and Voss,  
232 1977) showed that a soluble protein, plus a component of the particulate fraction of extracts, were  
233 necessary for cyanogenesis. The soluble protein was found to be a D-amino acid oxidase, a  
234 flavoprotein, partially purified by Pistorius and Voss (Knowles and Bunch, 1986).

235 The production of cyanide in cyanobacteria has been reported only once in *Anacystis nidulans*  
236 (= *Asterocapsa nidulans*), *Plectonema borganum*, and *Nostoc muscorum* 40 years ago (Pistorius et  
237 al., 1979; Vennessland, 1981). Pistorius et al. (Pistorius et al., 1979) reported that histidine could  
238 stimulate HCN production. Larger quantities of HCN were produced if peroxidase, or certain redox  
239 metals, were also present suggesting that either the amino acid oxidase is located in the outer part of  
240 the cells, or the imino acid intermediate is excreted (Vennessland, 1981). Not surprisingly, the cells  
241 carried an L-amino acid oxidase (Pistorius and Voss, 1980). This enzyme has two subunits, each of  
242 49,000 molecular weight, and contains one molecule of FAD per molecule of enzyme. It acts only on  
243 basic amino acids. Histidine is oxidized at a much slower rate. It is inhibited by divalent cations and  
244 orthophenanthroline. This latter observation implied a requirement for a metal ion, like zinc  
245 (Vennessland, 1981). In *A. nidulans* the L-amino acid oxidase has been reported to be associated with  
246 photosystem I (Pistorius and Voss, 1982).

247 All HCN-producing strains had the *nifH* gene, indicating that are capable of N<sub>2</sub> fixation, and thus  
248 suggesting that their ability to fix nitrogen could be linked to the production and simultaneously  
249 reduction of HCN, although this needs to be confirmed. Nitrogen fixation has been linked with cyanide  
250 not only in living organisms (Knowles and Bunch, 1986), but also through synthetic methods for  
251 terminal nitride functionalization via conversion to the rare methoxymethyl imido unit (Curley et al.,  
252 2011). The ability of strains to fix nitrogen and produce cyanide seems to be not strictly related with  
253 heterocyte formation, as *nifH* gene fragment was also present in non-heterocytous cyanobacteria  
254 strains that produce nitrogen. Non-heterocytous cyanobacteria can fix nitrogen either in dark  
255 (Bergman et al., 2006) or in light combined with mechanisms for protecting the O<sub>2</sub>-labile nitrogenase  
256 (Berrendero et al., 2016). HCN can inhibit a wide range of metabolic processes (Knowles and Bunch,  
257 1986), but the most pertinent effect in photosynthetic micro-organisms seems to be the inhibition of  
258 the reduced form of nitrate reductase (Lorimer et al., 1974).

259 An interesting relation was noticed concerning the relative frequency of HCN production  
260 amongst different cyanobacteria lifestyles. In the present study, cyanobacteria strains, isolated from

261 epilithic mats, found to be more capable of HCN production compared to strains from aquatic  
262 ecosystems. Since cyanogenesis is a defence mechanism widely distributed in the plant kingdom and  
263 present in many major crop species (Thompson et al., 2016; Alberti et al., 2017), our results could  
264 possibly imply an unidentified chemical cue, released by different grazers, that triggers cyanobacteria  
265 to use HCN as a defence mechanism. Indeed, in environments where cyanobacteria are vulnerable  
266 to grazers such as rotifers or ciliates a rapid defence system should be favoured evolutionary (Wolfe,  
267 2000). Even though no direct observations of activated chemical systems in unicellular organisms  
268 have been made, there are several examples of activated microbial defence reactions, which might  
269 serve as conceptual models for such systems (Mazard et al., 2016). One cannot exclude that physical  
270 contact with a grazer might stimulate cyanobacteria cells to produce compounds with a potential  
271 defensive role. Yang et al. (Yang and Kong, 2012) observed that the cyanobacterium *Microcystis*  
272 *aeruginosa* remaining under *Ochromonas* grazer pressure not only created colonies but also  
273 increased the amount of produced exopolysaccharides.

274 Cyanobacteria that thrive under extreme and diverse conditions tend to accumulate more  
275 compatible solubles such as sucrose, trehalose, glucosylglycerol, and glycine (Soule and  
276 Garcia-Pichel, 2019). However glycine accumulation could be toxic for the cyanobacterium and  
277 should be moderated (Eisenhut et al., 2007). Castric et al. (Castric, 1983) suggested that  
278 cyanogenesis is a response to a build-up of the intracellular glycine concentration. The key primary  
279 metabolic enzymes are serine hydroxymethyltransferase and glycine cleavage enzyme which  
280 catalyse conversion of serine into glycine and glycine into CO<sub>2</sub> and ammonia, respectively. This could  
281 be the link between HCN production and cyanobacteria that pose a non planktic lifestyle.

#### 282 4.2 Biodiversity

283 The polyphasic taxonomy applied to the strains of this study revealed taxa known to be part of  
284 bloom-forming communities (*Sphaerospermopsis* and *Nodularia*), rock-dwelling communities  
285 (*Scytonema* and *Tolypothrix*), and hot spring cyanobacteria mats (*Desertifilum* and *Gloeotrichia*)  
286 (Dadheech et al., 2014; Mazur-Marzec et al., 2015; Gkelis et al., 2017; Joanna and Andrzej, 2018).  
287 Our results revealed the presence of taxa not previously described from Greek habitats (Gkelis et al.,  
288 2016), such as *Allinostoc* (Saraf et al., 2018) and *Oculatella* (Osorio-Santos et al., 2014) and taxa  
289 previously described only from the tropical zone like *Komarekiella* and *Kovacikia* (Miscoe et al., 2016;  
290 Hentschke et al., 2017). Furthermore, the *Geitleria calcarea* strain isolated in this study, to the best of  
291 our knowledge, is the first isolate in world's cyanobacteria culture collections depositories  
292 (Friedmann, 1979; Coute, 1989), whilst *Chlorogloea* sp. TAU-MAC 0618 consists the first bacteria  
293 isolate from an anchialine type environment.

294 The strains TAU-MAC 0817 and 3417 isolated from two brackish environments belong to  
295 species *Nodularia harveyana* and *Nodularia spumigena*, respectively. These strains constitute the  
296 first isolates of *Nodularia* strains in Greece, whilst in the Mediterranean there are only five strains of  
297 *Nodularia* isolated from Turkey (Akcaalan et al., 2009). The scarce records of *Nodularia* across  
298 Mediterranean could be linked with the absence of a high number of brackish environments.  
299 Anagnostidis (Anagnostidis, 1968), decades ago, reported the occurrence of *N. spumigena* and *N.*  
300 *harveyana* in Greece, (Gkelis et al., 2016). The largest research activity on the genus *Nodularia*  
301 occurs on the Baltic Sea, where *Nodularia spumigena* forms highly toxic blooms with significant  
302 effects on aquatic and non-aquatic organisms (Sivonen et al., 1989; Finni et al., 2001; Mazur-Marzec  
303 et al., 2015). Strain TAU-MAC 1517, isolated from a thermal site in Iceland was classified to the  
304 species *Desertifilum tharense* in both phylogenetic and morphological analysis, exhibiting the  
305 trichome's "anchored" end, that discriminates it from *Microcoleus* and *Geitlerinema* (Dadheech et al.,  
306 2014). *Desertifilum tharense* has been recorded in India, Kenya, Mexico, Greece, Mongolia, and  
307 China (González-Resendiz et al., 2019). The presence of *Desertifilum tharense* in Iceland, a different  
308 ecological niche, supports the theory that despite its wide ecological span, the genus *Desertifilum*  
309 remains genetically stable (Sinetova et al., 2017; González-Resendiz et al., 2019).

310 Several strains of this study, such as *Geitleria calcarea*, *Kovacikia muscicola*, *Komarekiella* sp.,  
311 *Scytonema hyalinum*, and *Tolypothrix* sp. were isolated from extensive dark-green coverings  
312 dominated by cyanobacteria like *Phormidium*, *Tolypothrix*, *Scytonema*, and *Geitleria* species.  
313 Cyanobacteria are considered the pioneering inhabitants in cave colonization (Joanna and Andrzej,

314 2018). They prevail in the cave entrances compared to the other microalgae (Mulec and Kosi, 2009)  
315 by colonizing various parts of the cave entrances, where biodiversity is the lowest (Vinogradova N. et  
316 al., 1998). Cyanobacteria represent the first photosynthetic colonizers on the calcareous surfaces  
317 usually thriving both as epiliths and as endoliths (Lamprinou et al., 2009). Lamprinou et al.  
318 (Lamprinou et al., 2013) observed predominance of Oscillatoriales group over Chroococcales in  
319 caves; our results show that also many Nostocales species form part of the cave communities,  
320 several of which, are understudied. For example, the *Komarekiella* sp. strains we isolated here are  
321 reported for the first time as cave inhabitants. Hentschke et al. (Hentschke et al., 2017), based on  
322 intensive examination of species life cycle, proposed the new genus *Komarekiella* and classified the  
323 strains from both Hawaiian and Brazilian rainforests in the single *Komarekiella atlantica* species. Our  
324 phylogenetic analysis of 16-23S and *cpcBA*-IGS sequences, as well as the different climatic zone and  
325 habitat, suggests that strains TAU-MAC 0117 and 0217, may belong to a new taxon, thus further  
326 research is required to describe it. Concerning *Geitleria calcarea* TAU-MAC 0118, as in the original  
327 description of the species, the most obvious finding is its apparent inability to produce heterocytes  
328 naturally (Coute, 1989). In our phylogenetic analysis, *Geitleria calcarea* TAU-MAC 0118 clustered  
329 with the only two available *Geitleria* sequences in GenBank, belonging to a non-cultured *Geitleria*  
330 species, derived from a population genetics study.

331 Terrestrial meteoric water mixed with saline groundwater resembles in a two-layered circulation,  
332 in estuaries termed as subterranean estuaries or anchialine (meaning near the sea) environments  
333 (Moore, 1999). *Chlorogloea* sp. TAU-MAC 0618 consists, to the best of our knowledge, the first  
334 bacterium isolate from this type of environments, as the research concerning bacteria, is focused  
335 mainly in community analysis, either by metagenomics (Brankovits et al., 2017), or fluorescence  
336 microbial profiling analysis (Seymour et al., 2007; Krstulović et al., 2013).  
337

## 338 5. Conclusions

339 The analysis of cyanobacteria strains from various environments revealed a high degree of  
340 biodiversity, deserving further research, whilst molecular data from strains may provide new  
341 information for cyanobacteria diversity, such as the isolation and characterisation of species like  
342 *Geitleria calcarea* and *Kovackia muscicola* that provided a missing study material for underexplored  
343 cyanobacteria. We demonstrated the production of HCN by cyanobacteria spanning a wide  
344 taxonomic range across different habitats and lifestyles. The high percentage of epilithic  
345 cyanobacteria producing HCN suggest that it may be also used as defence mechanism, therefore  
346 exploiting cyanide production very differently compared to other cyanogenic microbes. All  
347 HCN-producing cyanobacteria carried the *nifH* gene fragment highlighting the complex mechanisms  
348 between nitrogen fixation and HCN production. The widespread cyanide production we report here  
349 calls for further research to investigate the significance cyanide metabolism has in the cycling of  
350 carbon and nitrogen, especially as plants, and probably cyanobacteria, both produce and catabolize  
351 cyanide.

352 **Supplementary Materials:** Table S1: Complete list of TAU-MAC cyanobacteria strains used in this study, along  
353 with their description reference and the result of HCN Production. Plate position refers to Fig. S1 and strain  
354 number refers to Fig. S2. Strain number column refer to the number assigned to each strain for the PCR  
355 amplification of *nifH* gene fragment, Table S2: PCR primers used the phylogenetic analysis of cyanobacteria  
356 strains of TAU-MAC culture collection. Table S3: GenBank accession numbers for TAU-MAC strains used in the  
357 phylogenetic analysis **Figure S1:** Feigl-Anger Papers of the HCN producing strains. Blue dot is indicating the  
358 production of HCN. Plate position per strain refers to table S3. Con indicates positive control - *Trifolium repens*,  
359 Figure S2: PCR amplification of *nifH* gene fragment in the 78 TAU-MAC cyanobacteria strains tested for HCN  
360 production. Sample numbers refer to Table S3; + and - indicate positive and negative control, respectively; L  
361 indicates DNA ladder.

362 **Funding:** M.P and S.G. would like to acknowledge co-funding of this work by the European Union and Greek  
363 national funds through the Operational Program Competitiveness, Entrepreneurship and Innovation, under the  
364 call RESEARCH - CREATE - INNOVATE (project code: T1EDK-02681).

365 **Acknowledgments:** The authors would like to thank Mrs. Kristel Panksep and Dr. Alejandro Martinez for  
366 providing sample material from Lake Peipsei (Estonia) and Túnel de la Atlántida (Lanzarote, Canary Islands),  
367 respectively. The authors would like also to thank Mr. Georgios Kakkos and Mr. Kostas Magkos for providing  
368 permission for sampling inside the Perama and Olympon Show Caves, respectively. Mr. Eythimios Parisi and



369 Ms. Christina Skodra are acknowledged for providing help for the isolation of some strains as part of their  
370 final-year project supervised by S.G.

371 **Conflicts of Interest:** The authors declare no conflict of interest.

372

## 373 References

374 Akcaalan, R., Mazur-Marzec, H., Zalewska, A., and Albay, M. (2009). Phenotypic and toxicological  
375 characterization of toxic *Nodularia spumigena* from a freshwater lake in Turkey. *Harmful Algae* 8, 273–278.  
376 doi:10.1016/j.hal.2008.06.007.

377 Alberti, M., Marzluff, J., and Hunt, V. M. (2017). Urban driven phenotypic changes: empirical observations and  
378 theoretical implications for eco-evolutionary feedback. *Philos. Trans. R. Soc. B Biol. Sci.* 372, 20160029.  
379 doi:10.1098/rstb.2016.0029.

380 Allen, J. F. (2015). Why chloroplasts and mitochondria retain their own genomes and genetic systems:  
381 Colocation for redox regulation of gene expression. *Proc. Natl. Acad. Sci. U. S. A.* 112, 10231–8.  
382 doi:10.1073/pnas.1500012112.

383 Anagnostidis, K. (1968). Investigations of Sulphur-communities (Sulphuretum) in marine and freshwater  
384 habitats. A taxonomic, floristic, ecological, phytosociological, phytogeographic study. *Sci. Ann. Fac. Sci.*  
385 *Aristotle Univ. Thessaloniki, Thessaloniki*, 406–866 pp.

386 Anagnostidis, K., and Komarek, J. (1988). Modern approach to the classification system of cyanophytes.  
387 3-Oscillatoriales. *Algol. Stud. f{ü}r Hydrobiol. Suppl. Vol.*, 327{textendash}472.

388 Barceloux, D. G. (2009). Cyanogenic Foods (Cassava, Fruit Kernels, and Cycad Seeds). *Disease-a-Month* 55,  
389 336–352. doi:10.1016/j.disamonth.2009.03.010.

390 Bergman, B., Gallon, J. R., Rai, A. N., and Stal, L. J. (2006). N<sub>2</sub> Fixation by non-heterocystous cyanobacteria 1.  
391 *FEMS Microbiol. Rev.* 19, 139–185. doi:10.1111/j.1574-6976.1997.tb00296.x.

392 Berrendero, E., Valiente, E. F., Perona, E., Gómez, C. L., Loza, V., Munõz-Martín, M. Á., et al. (2016). Nitrogen  
393 fixation in a non-heterocystous cyanobacterial mat from a mountain river. *Sci. Rep.* 6, 1–13.  
394 doi:10.1038/srep30920.

395 Brankovits, D., Pohlman, J. W., Niemann, H., Leigh, M. B., Leewis, M. C., Becker, K. W., et al. (2017).  
396 Methane-and dissolved organic carbon-fueled microbial loop supports a tropical subterranean estuary  
397 ecosystem. *Nat. Commun.* 8. doi:10.1038/s41467-017-01776-x.

398 Castric, P. A. (1983). Hydrogen cyanide production by *Pseudomonas aeruginosa* at reduced oxygen levels. *Can.*  
399 *J. Microbiol.* 29, 1344–1349. doi:10.1139/m83-209.

400 Chen, X., Schreiber, K., Appel, J., Makowka, A., Fähnrich, B., Roettger, M., et al. (2016). The Entner-Doudoroff  
401 pathway is an overlooked glycolytic route in cyanobacteria and plants. *Proc. Natl. Acad. Sci. U. S. A.* 113,  
402 5441–5446. doi:10.1073/pnas.1521916113.

403 Coute, A. (1989). *Geitleria calcarea* Friedmann ( *Cyanophyceae*, *Hormogonophycidae*, *Stigonematales*,  
404 *Stigonemataceae* ): un cas d'adaptation à un milieu extrême. *Bull. la Société Bot. Fr. Actual. Bot.* 136,  
405 113–130. doi:10.1080/01811789.1989.10826921.

406 Curley, J. J., Cozzolino, A. F., and Cummins, C. C. (2011). Nitrogen fixation to cyanide at a molybdenum center.  
407 *Dalt. Trans.* 40, 2429–2432. doi:10.1039/c0dt01326a.

408 Dadheech, P. K., Mahmoud, H., Kotut, K., and Krienitz, L. (2014). Desertifilum fontinale sp. nov. (Oscillatoriales,  
409 Cyanobacteria) from a warm spring in East Africa, based on conventional and molecular studies. *Fottea*  
410 14, 129–140. doi:10.5507/fot.2014.010.

411 Deligiannis, E., Karousou, R., and Gkelis, S. (2018). Cyanogenesis of white clover (*Trifolium repens*) populations



- 412 in the urbanization gradient of Thessaloniki (Greece). Proceedings of the 7th Balcan Botanical Conference.  
413 *Bot. Serbica* 42, 65.
- 414 Dzombak, D., Shosh, R. S., and Wong-Chong, G. M. (2006). "Degradation of Cyanide to Ammonia and Nitrate by  
415 Mixed Culture of *Agrobacterium Tumefaciens* SUTS 1 and *Pseudomonas Monteillii* SUTS 2," in *Cyanide in  
416 water and soil: chemistry, risk, and management*, 10. Available at:  
417 [http://papers.iafor.org/wp-content/uploads/papers/ecsee2014/ECSEE2014\\_03488.pdf](http://papers.iafor.org/wp-content/uploads/papers/ecsee2014/ECSEE2014_03488.pdf) [Accessed  
418 December 23, 2019].
- 419 Eisenhut, M., Bauwe, H., and Hagemann, M. (2007). Glycine accumulation is toxic for the cyanobacterium  
420 *Synechocystis* sp. strain PCC 6803, but can be compensated by supplementation with magnesium ions.  
421 *FEMS Microbiol. Lett.* 277, 232–237. doi:10.1111/j.1574-6968.2007.00960.x.
- 422 Eisler, R., and Wiemeyer, S. N. (2004). Cyanide hazards to plants and animals from gold mining and related  
423 water issues. *Rev. Environ. Contam. Toxicol.* 183, 21–54. Available at:  
424 <http://www.ncbi.nlm.nih.gov/pubmed/15369321> [Accessed October 14, 2019].
- 425 Finni, T., Kononen, K., Olsonen, R., and Wallström, K. (2001). The history of cyanobacterial blooms in the Baltic  
426 Sea. *Ambio* 30, 172–8. Available at: <http://www.ncbi.nlm.nih.gov/pubmed/11697246> [Accessed June 12,  
427 2017].
- 428 Friedmann, E. I. (1979). The genus *Geitleria* (Cyanophyceae or Cyanobacteria): Distribution of *G. calcarea* and  
429 *G. floridana* n. sp. *Plant Syst. Evol.* 131, 169–178. doi:10.1007/BF00984251.
- 430 Gantzer, C. J., and Maier, W. J. (1990). Biological Degradation of Cyanide by Nitrogen-Fixing Cyanobacteria.
- 431 Gernah, D. I., Ariahu, C. C., and Ingbian, E. K. (2011). Effects of Malting and Lactic Fermentation on Some  
432 Chemical and Functional Properties of Maize (*Zea mays*). *Am. J. Food Technol.* 6, 404–412.  
433 doi:10.3923/ajft.2011.404.412.
- 434 Gewitz, H.S., Pistorius, E. K., Voss, H., and Vennesland, B. (1976a). Cyanide formation in preparations from  
435 *Chlorella* and New Zealand spinach leaves: Effect of added amino acids. *Planta* 131, 149–153.  
436 doi:10.1007/BF00389987.
- 437 Gewitz, H.S., Pistorius, E. K., Voss, H., and Vennesland, B. (1976b). Cyanide formation in preparations from  
438 *Chlorella vulgaris* Beijerinck: Effect of sonication and amygdalin addition. *Planta* 131, 145–148.  
439 doi:10.1007/BF00389986.
- 440 Gewitz, H. S., Piefke, J., Langowska, K., and Vennesland, B. (1980). The formation of hydrogen cyanide from  
441 histidine in the presence of amino acid oxidase and peroxidase. *BBA - Enzymol.* 611, 11–26.  
442 doi:10.1016/0005-2744(80)90037-6.
- 443 Gkelis, S., Lanaras, T., and Sivonen, K. (2015). Cyanobacterial toxic and bioactive peptides in freshwater bodies  
444 of Greece: Concentrations, occurrence patterns, and implications for human health. *Mar. Drugs* 13,  
445 6319–6335. doi:10.3390/md13106319.
- 446 Gkelis, S., Ourailidis, I., Panou, M., and Pappas, N. (2016). Cyanobacteria of Greece: an annotated checklist.  
447 *Biodivers. Data J.* 4. doi:10.3897/BDJ.4.e10084.
- 448 Gkelis, S., and Panou, M. (2016). Capturing biodiversity: Linking a cyanobacteria culture collection to the  
449 "scratchpads" virtual research environment enhances biodiversity knowledge. *Biodivers. Data J.* 4.  
450 doi:10.3897/BDJ.4.e7965.
- 451 Gkelis, S., Panou, M., Chronis, I., Zervou, S.-K., Christophoridis, C., Manolidi, K., et al. (2017). Monitoring a  
452 newly re-born patient: water quality and cyanotoxin occurrence in a reconstructed shallow Mediterranean  
453 lake. *Adv. Oceanogr. Limnol.* 8. doi:10.4081/aiol.2017.6350.
- 454 Gkelis, S., Panou, M., Konstantinou, D., Apostolidis, P., Kasampali, A., Papadimitriou, S., et al. (2019). Diversity,  
455 Cyanotoxin Production, and Bioactivities of Cyanobacteria Isolated from Freshwaters of Greece. *Toxins*

- 456 (Base). 11, 436. doi:10.3390/toxins11080436.
- 457 Gkelis, S., Rajaniemi, P., Vardaka, E., Moustaka-Gouni, M., Lanaras, T., and Sivonen, K. (2005). *Limnothrix*  
458 *redekei* (Van Goor) Meffert (Cyanobacteria) strains from Lake Kastoria, Greece form a separate  
459 phylogenetic group. *Microb. Ecol.* 49, 176–182. doi:10.1007/s00248-003-2030-7.
- 460 Gleadow, R. M., and Møller, B. L. (2014). Cyanogenic Glycosides: Synthesis, Physiology, and Phenotypic  
461 Plasticity. *Annu. Rev. Plant Biol.* 65, 155–185. doi:10.1146/annurev-arplant-050213-040027.
- 462 González-Resendiz, L., Johansen, J. R., León-Tejera, H., Sánchez, L., Segal-Kischinevzky, C.,  
463 Escobar-Sánchez, V., et al. (2019). A bridge too far in naming species: a total evidence approach does not  
464 support recognition of four species in *Desertifilum* (Cyanobacteria). *J. Phycol.* 911, 898–911.  
465 doi:10.1111/jpy.12867.
- 466 Gumsley, A. P., Chamberlain, K. R., Bleeker, W., Söderlund, U., de Kock, M. O., Larsson, E. R., et al. (2017).  
467 Timing and tempo of the Great Oxidation Event. *Proc. Natl. Acad. Sci. U. S. A.* 114, 1811–1816.  
468 doi:10.1073/pnas.1608824114.
- 469 Gupta, V., Ratha, S. K., Sood, A., Chaudhary, V., and Prasanna, R. (2013). New insights into the biodiversity and  
470 applications of cyanobacteria (blue-green algae)—Prospects and challenges. *Algal Res.* 2, 79–97.  
471 doi:10.1016/J.ALGAL.2013.01.006.
- 472 Hall, A. H. (2007). Sodium Thiosulfate or Hydroxocobalamin for the Empiric Treatment of Cyanide Poisoning?  
473 *Ann. Emerg. Med.* 49. doi:10.1016/j.annemergmed.2006.09.021.
- 474 Hentschke, S., Johansen, J. R., Pietrasiak, N., Rigonato, J., Fiore, M. F., and Leite Sant’Anna, C. (2017).  
475 *Komarekiella atlantica* gen. et sp. nov. (Nostocaceae, Cyanobacteria): a new subaerial taxon from the  
476 Atlantic Rainforest and Kauai, Hawaii. *Fottea* 17, 178–190. doi:10.5507/fot.2017.002.
- 477 Hubalek, V., Wu, X., Eiler, A., Buck, M., Heim, C., Dopson, M., et al. (2016). Connectivity to the surface  
478 determines diversity patterns in subsurface aquifers of the Fennoscandian shield. *ISME J.* 10, 2447–2458.  
479 doi:10.1038/ismej.2016.36.
- 480 Joanna, C.-M., and Andrzej, M. (2018). “Diversity of Cyanobacteria on Limestone Caves,” in *Cyanobacteria*  
481 (InTech). doi:10.5772/intechopen.79750.
- 482 Kim, I. S., Nguyen, G.-H., Kim, S.-Y., Lee, J.-W., and Yu, H.-W. (2009). Evaluation of Methods for Cyanobacterial  
483 Cell Lysis and Toxin (Microcystin-LR) Extraction Using Chromatographic and Mass Spectrometric  
484 Analyses. *Environ. Eng. Res.* 14, 250–254. doi:10.4491/eer.2009.14.4.250.
- 485 Knowles, C. J., and Bunch, A. W. (1986). Microbial Cyanide Metabolism. *Adv. Microb. Physiol.* 27, 73–111.  
486 doi:10.1016/S0065-2911(08)60304-5.
- 487 Komárek, J. (2013). *Heterocytous Genera*. Springer Spektrum Available at:  
488 <https://www.springer.com/la/book/9783827409324> [Accessed July 5, 2018].
- 489 Komarek, J., and Anagnostidis, K. (1989). Modern approach to the classification system of Cyanophytes  
490 4-Nostocales. *Algol. Stud. f{ü}r Hydrobiol. Suppl. Vol.*, 247{\textendash}345.
- 491 Komárek, J., and Anagnostidis, K. (2008). *Cyanoprokaryota; 1. Teil. Chroococcales -- 2. Teil. Oscillatoriales*.  
492 Spektrum.
- 493 Konstantinou, D., Gerovasileiou, V., Voultsiadou, E., and Gkelis, S. (2018). Sponges-cyanobacteria  
494 associations: Global diversity overview and new data from the Eastern Mediterranean. *PLoS One* 13,  
495 1–22. doi:10.1371/journal.pone.0195001.
- 496 Konstantinou, D., Voultsiadou, E., Panteris, E., Zervou, S., Hiskia, A., and Gkelis, S. (2019). *Leptothoe*, a new  
497 genus of marine cyanobacteria (Synechococcales) and three new species associated with sponges from  
498 the Aegean Sea. *J. Phycol.*, jpy.12866. doi:10.1111/jpy.12866.
- 499 Krstulović, N., Šolić, M., Maršić-Lučić, J., Šestanović, S., and Ordulj, M. (2013). Microbial community structure in

- 500 two anchialine caves on Mljet Island (Adriatic sea). *Acta Adriat.* 54, 183–197.
- 501 Kumar, R., Saha, S., Dhaka, S., Kurade, M. B., Kang, C. U., Baek, S. H., et al. (2017). Remediation of  
502 cyanide-contaminated environments through microbes and plants: a review of current knowledge and  
503 future perspectives. *Geosystem Eng.* 20, 28–40. doi:10.1080/12269328.2016.1218303.
- 504 Kumar, S., Stecher, G., and Tamura, K. (2016). MEGA7: Molecular Evolutionary Genetics Analysis Version 7.0  
505 for Bigger Datasets. *Mol. Biol. Evol.* 33, 1870–1874. doi:10.1093/molbev/msw054.
- 506 Lamprinou, V., Pantazidou, A., Papadogiannaki, G., Radea, C., and Economou-Amilli, A. (2009). Cyanobacteria  
507 and associated invertebrates in Leontari Cave. *Fottea* 9, 155–164. doi:10.5507/fot.2009.014.
- 508 Lamprinou, V., Skaraki, K., Kotoulas, G., Anagnostidis, K., Economou-Amilli, A., and Pantazidou, A. (2013). A  
509 new species of *Phormidium* (Cyanobacteria, Oscillatoriales) from three Greek Caves: morphological and  
510 molecular analysis. *Fundam. Appl. Limnol. / Arch. für Hydrobiol.* 182, 109–116.  
511 doi:10.1127/1863-9135/2013/0323.
- 512 Lorimer, G. H., Gewitz, H. S., Völker, W., and Solomonson, L. P. (1974). The presence of bound cyanide in the  
513 naturally inactivated form of nitrate reductase of *Chlorella vulgaris*. *J. Biol. Chem.* 249, 6074–6079.
- 514 Luque-Almagro, V. M., Moreno-Vivián, C., and Roldán, M. D. (2016). Biodegradation of cyanide wastes from  
515 mining and jewellery industries. *Curr. Opin. Biotechnol.* 38, 9–13. doi:10.1016/j.copbio.2015.12.004.
- 516 Mazard, S., Penesyan, A., Ostrowski, M., Paulsen, I. T., and Egan, S. (2016). Tiny Microbes with a Big Impact:  
517 The Role of Cyanobacteria and Their Metabolites in Shaping Our Future. *Mar. Drugs* 14.  
518 doi:10.3390/md14050097.
- 519 Mazur-Marzec, H., Błaszczuk, A., Felczykowska, A., Hohlfeld, N., Kobos, J., Toruńska-Sitarz, A., et al. (2015).  
520 Baltic cyanobacteria – a source of biologically active compounds. *Eur. J. Phycol.* 50, 343–360.  
521 doi:10.1080/09670262.2015.1062563.
- 522 Miscoe, L. H., Johansen, J. R., Kocielek, J. P., Lowe, R. L., Vaccarino, M. A., Pietrasiak, N., et al. (2016). *The*  
523 *diatom flora and cyanobacteria from caves on Kauai, Hawaii*. Available at:  
524 [https://www.schweizerbart.de/publications/detail/isbn/9783443600471/Bibliotheca\\_Phycologica\\_Band\\_1](https://www.schweizerbart.de/publications/detail/isbn/9783443600471/Bibliotheca_Phycologica_Band_1)  
525 20 [Accessed October 14, 2019].
- 526 Moore, W. S. (1999). The subterranean estuary: A reaction zone of ground water and sea water. in *Marine*  
527 *Chemistry*, 111–125. doi:10.1016/S0304-4203(99)00014-6.
- 528 Mulec, J., and Kosi, G. (2009). Lampenflora algae and methods of growth control. *J. Cave Karst Stud.* 71,  
529 109–115.
- 530 Nielsen, A. Z., Mellor, S. B., Vavitsas, K., Wlodarczyk, A. J., Gnanasekaran, T., Perestrello Ramos H de Jesus,  
531 M., et al. (2016). Extending the biosynthetic repertoires of cyanobacteria and chloroplasts. *Plant J.* 87,  
532 87–102. doi:10.1111/tpj.13173.
- 533 Okonechnikov, K., Golosova, O., Fursov, M., and UGENE team (2012). Unipro UGENE: a unified bioinformatics  
534 toolkit. *Bioinformatics* 28, 1166–1167. doi:10.1093/bioinformatics/bts091.
- 535 Osorio-Santos, K., Pietrasiak, N., Bohunická, M., Miscoe, L. H., Kováčik, L., Martin, M. P., et al. (2014). Seven  
536 new species of *Oculatella* (Pseudanabaenales, Cyanobacteria): taxonomically recognizing cryptic  
537 diversification. *Eur. J. Phycol.* 49, 450–470. doi:10.1080/09670262.2014.976843.
- 538 Panou, M., Zervou, S.-K., Kaloudis, T., Hiskia, A., and Gkelis, S. (2018). A Greek *Cylindrospermopsis raciborskii*  
539 strain: Missing link in tropic invader's phylogeography tale. *Harmful Algae* 80, 96–106.  
540 doi:10.1016/J.HAL.2018.10.002.
- 541 Park, J. M., Trevor Sewell, B., and Benedik, M. J. (2017). Cyanide bioremediation: the potential of engineered  
542 nitrilases. *Appl. Microbiol. Biotechnol.* 101, 3029–3042. doi:10.1007/s00253-017-8204-x.
- 543 Pistorius, E. K., Jetschmann, K., Voss, H., and Vennesland, B. (1979). The dark respiration of *Anacystis*

- 544 *nidulans*: Production of HCN from histidine and oxidation of basic amino acids. *Biochim. Biophys. Acta -*  
545 *Gen. Subj.* 585, 630–642. doi:10.1016/0304-4165(79)90195-8.
- 546 Pistorius, E. K., and Voss, H. (1977). A D-amino acid oxidase from *Chlorella vulgaris*. *Biochim. Biophys. Acta -*  
547 *Enzymol.* 481, 395–406. doi:10.1016/0005-2744(77)90273-X.
- 548 Pistorius, E. K., and Voss, H. (1980). Some properties of a basic L-amino-acid oxidase from *Anacystis nidulans*.  
549 *BBA - Enzymol.* 611, 227–240. doi:10.1016/0005-2744(80)90059-5.
- 550 Pistorius, E. K., and Voss, H. (1982). Presence of an Amino Acid Oxidase in Photosystem II of *Anacystis*  
551 *nidulans*. *Eur. J. Biochem.* 126, 203–209. doi:10.1111/j.1432-1033.1982.tb06767.x.
- 552 Puente-Sánchez, F., Arce-Rodríguez, A., Oggerin, M., García-Villadangos, M., Moreno-Paz, M., Blanco, Y., et  
553 al. (2018). Viable cyanobacteria in the deep continental subsurface. *Proc. Natl. Acad. Sci. U. S. A.* 115,  
554 10702–10707. doi:10.1073/pnas.1808176115.
- 555 Rambaut, A. FigTree. Available at: <http://tree.bio.ed.ac.uk/software/figtree/> [Accessed July 7, 2018].
- 556 Rippka, R. (1988). Isolation and purification of cyanobacteria. *Methods Enzymol.* 167, 3–27. Available at:  
557 <http://www.ncbi.nlm.nih.gov/pubmed/3148836> [Accessed July 7, 2018].
- 558 Ronquist, F., Teslenko, M., van der Mark, P., Ayres, D. L., Darling, A., Höhna, S., et al. (2012). MrBayes 3.2:  
559 efficient Bayesian phylogenetic inference and model choice across a large model space. *Syst. Biol.* 61,  
560 539–42. doi:10.1093/sysbio/sys029.
- 561 Saraf, A., Dawda, H. G., Suradkar, A., Behere, I., Kotulkar, M., Shaikh, Z. M., et al. (2018). Description of two  
562 new species of *Aliinostoc* and one new species of *Desmonostoc* from India based on the Polyphasic  
563 Approach and reclassification of *Nostoc punensis* to *Desmonostoc punense* comb. nov. *FEMS Microbiol.*  
564 *Lett.* 365. doi:10.1093/femsle/fny272.
- 565 Seymour, J. R., Humphreys, W. F., and Mitchell, J. G. (2007). Stratification of the microbial community inhabiting  
566 an anchialine sinkhole. *Aquat. Microb. Ecol.* 50, 11–24. doi:10.3354/ame01153.
- 567 Sinetova, M. A., Bolatkhan, K., Sidorov, R. A., Mironov, K. S., Skrypnik, A. N., Kupriyanova, E. V., et al. (2017).  
568 Polyphasic characterization of the thermotolerant cyanobacterium *Desertifilum* sp. strain IPPAS B-1220.  
569 *FEMS Microbiol. Lett.* 364, fnx027. doi:10.1093/femsle/fnx027.
- 570 Singh, J. S., Kumar, A., Rai, A. N., and Singh, D. P. (2016). Cyanobacteria: A Precious Bio-resource in  
571 Agriculture, Ecosystem, and Environmental Sustainability. *Front. Microbiol.* 7, 529.  
572 doi:10.3389/fmicb.2016.00529.
- 573 Sivonen, K., Kononen, K., Carmichael, W. W., Dahlem, A. M., Rinehart, K. L., Kiviranta, J., et al. (1989).  
574 Occurrence of the hepatotoxic cyanobacterium *Nodularia spumigena* in the Baltic Sea and structure of the  
575 toxin. *Appl. Environ. Microbiol.* 55, 1990–1995.
- 576 Soule, T., and Garcia-Pichel, F. (2019). Cyanobacteria. *Encycl. Microbiol.*, 799–817.  
577 doi:10.1016/B978-0-12-809633-8.20886-8.
- 578 Swofford, D. L. (2002). Phylogenetic Analysis Using Parsimony. *Options* 42, 294–307.  
579 doi:10.1007/BF02198856.
- 580 Thompson, K. A., Renaudin, M., and Johnson, M. T. J. (2016). Urbanization drives the evolution of parallel clines  
581 in plant populations. *Proc. R. Soc. B Biol. Sci.* 283. doi:10.1098/rspb.2016.2180.
- 582 Timmis, J. N., Ayliffe, M. A., Huang, C. Y., and Martin, W. (2004). Endosymbiotic gene transfer: organelle  
583 genomes forge eukaryotic chromosomes. *Nat. Rev. Genet.* 5, 123–135. doi:10.1038/nrg1271.
- 584 Vennesland, B. (1981). *Cyanide in biology.*, ed. European Molecular Biology Organization Academic Press.
- 585 Vennesland, B., Castric, P. A., Conn, E. E., Solomonson, L. P., Volini, M., and Westley, J. (1982). Cyanide  
586 metabolism. *Fed. Proc. Fed. Am. Societies Exp. Biol. Med.* 41, 2639–48. Available at:  
587 <http://www.ncbi.nlm.nih.gov/pubmed/7106306> [Accessed December 23, 2019].

- 588 Vinogradova N., O., Kovalenko, O. V., Wasser, S. P., Nevo, E., and Weinstein-Evron, M. (1998). Species  
589 diversity gradient to darkness stress in blue-green algae/cyanobacteria: A microscale test in a prehistoric  
590 cave, Mount Carmel, Israel. *Isr. J. Plant Sci.* 46, 229–238. doi:10.1080/07929978.1998.10676732.
- 591 Wink, M. (2003). Evolution of secondary metabolites from an ecological and molecular phylogenetic perspective.  
592 *Phytochemistry* 64, 3–19. doi:10.1016/S0031-9422(03)00300-5.
- 593 Wink, M. (2008). Plant Secondary Metabolism: Diversity, Function and its Evolution. *Nat. Prod. Commun.* 3,  
594 1934578X0800300. doi:10.1177/1934578X0800300801.
- 595 Wolfe, G. (2000). The chemical defense ecology of marine unicellular plankton: constraints, mechanisms, and  
596 impacts. *Biol. Bull.* 198, 225–244. doi:10.2307/1542526.
- 597 Yang, Z., and Kong, F. (2012). Formation of large colonies: a defense mechanism of *Microcystis aeruginosa*  
598 under continuous grazing pressure by flagellate *Ochromonas* sp. *J. Limnol.* 71, 5.  
599 doi:10.4081/jlimnol.2012.e5.
